# Supplementary material for: The Early Childhood Oral Health Impact Scale (ECOHIS): psychometric properties and application on preschoolers
Source: PeerJ. 2023 Oct 9;11:e16035. doi: 10.7717/peerj.16035 (PMC10569180; doi:10.7717/peerj.16035)
Supplement: Supplemental Information 1 — Exported from the demographic information of the sample and the mean scores for oral health impact on the child and his family according to child’s sex, caries experience, and plaque index and mothers’ age, marital status, work activity, and economic strata applied for data analysis and preparation for Tables 1 and 3 respectively. [file peerj-11-16035-s001.xlsx]

## Sheet: VARIABLES
ID	agechild	sex	agemother	civilstatus	work	ESDIC	ceod	CEODIC	IHODIC	ECOHIS1	ECOHIS2	ECOHIS3	ECOHIS4	ECOHIS5	ECOHIS6	ECOHIS7	ECOHIS8	ECOHIS9	ECOHIS10	ECOHIS11	ECOHIS12	ECOHIS13	SCORE	ESRED	escoreF1	escoreF2
10	6	1	1	2	0	1	0	0	0	3	1	1	1	1	1	1	1	1	1	1	1	1	1.15385	1	1.22222	1
12	6	1	1	3	1	0	0	0	0	1	1	1	1	1	1	1	1	1	1	1	1	1	1	0	1	1
13	5	1	1	2	1	1	3	1	0	1	1	4	1	1	1	1	1	1	1	1	1	2	1.30769	1	1.33333	1.25
18	5	0	0	2	1	1	0	0	0	2	1	1	2	1	1	1	1	1	1	3	1	1	1.30769	1	1.22222	1.5
20	5	0	1	2	0	1	2	1	0	4	1	4	3	3	3	1	2	2	3	3	2	2	2.53846	1	2.55556	2.5
22	5	0	1	1	0	0	3	1	0	3	1	1	1	1	1	1	1	1	1	1	1	1	1.15385	0	1.22222	1
26	5	0	1	3	1	1	5	1	1	3	2	1	1	1	2	3	3	2	1	3	2	4	2.15385	1	2	2.5
28	5	0	1	2	1	1	2	1	0	1	1	1	3	1	1	1	2	2	1	2	2	2	1.53846	1	1.44444	1.75
29	6	0	1	2	1	1	0	0	0	1	1	1	2	1	1	1	1	1	1	1	1	1	1.07692	1	1.11111	1
31	5	0	1	2	0	0	0	0	0	1	1	1	1	1	1	1	1	1	3	1	3	1	1.30769	0	1	2
34	5	0	1	2	1	1	0	0	0	1	1	1	1	1	1	1	1	1	1	1	1	1	1	1	1	1
38	6	0	1	1	1	1	0	0	0	1	1	1	2	1	1	1	1	1	1	1	1	1	1.07692	1	1.11111	1
41	6	0	1	2	1	1	0	0	0	3	1	1	1	1	1	1	1	1	1	1	1	1	1.15385	1	1.22222	1
45	6	1	1	2	1	0	0	0	0	2	1	1	1	1	1	1	1	1	1	1	1	1	1.07692	0	1.11111	1
46	6	1	1	2	0	1	0	0	0	1	1	1	1	1	1	1	1	1	1	1	1	1	1	1	1	1
47	6	1	1	1	0	0	0	0	0	1	1	1	1	1	1	1	1	1	1	1	1	1	1	0	1	1
51	6	0	1	3	1	0	0	0	0	3	1	3	1	1	1	1	1	1	1	3	1	3	1.61539	0	1.44444	2
52	5	1	0	2	0	0	3	1	0	3	1	2	1	1	1	1	1	1	1	1	1	1	1.23077	0	1.33333	1
54	6	0	1	1	1	0	7	1	0	3	3	3	1	1	1	3	3	1	3	5	1	5	2.53846	0	2.11111	3.5
57	5	0	1	2	1	1	2	1	0	1	1	1	1	1	1	1	1	1	1	3	1	1	1.15385	1	1	1.5
67	6	1	1	1	1	0	1	1	0	1	2	1	1	1	2	2	1	1	1	1	1	1	1.23077	0	1.33333	1
68	5	1	1	2	1	1	0	0	0	1	1	1	1	1	1	1	1	1	1	1	1	1	1	1	1	1
75	6	1	0	1	1	0	20	1	1	3	1	1	1	2	2	2	2	2	2	4	2	2	2	0	1.77778	2.5
76	5	0	0	2	1	1	0	0	0	1	3	1	1	1	1	1	1	1	1	1	1	1	1.15385	1	1.22222	1
77	5	1	1	#NULL!	0	0	0	0	0	2	1	1	1	2	1	1	1	1	1	2	1	1	1.23077	0	1.22222	1.25
78	6	1	0	1	1	1	2	1	0	2	3	2	1	2	1	1	1	1	3	4	1	2	1.84615	1	1.55556	2.5
82	5	1	1	1	0	0	3	1	0	2	1	1	1	1	1	1	1	1	1	2	1	1	1.15385	0	1.11111	1.25
83	6	0	1	2	1	1	1	1	0	1	1	1	1	1	3	1	1	1	1	1	1	1	1.15385	1	1.22222	1
84	5	0	1	2	0	0	2	1	1	3	2	3	1	1	2	2	1	1	2	2	1	1	1.69231	0	1.77778	1.5
85	6	0	0	2	1	0	2	1	1	2	1	1	1	1	1	1	1	1	1	1	1	1	1.07692	0	1.11111	1
86	6	1	1	2	1	0	0	0	1	3	1	1	1	1	1	1	1	1	1	1	1	1	1.15385	0	1.22222	1
87	6	0	1	3	1	1	1	1	0	2	2	1	1	1	1	1	1	1	1	3	1	2	1.38461	1	1.22222	1.75
88	6	0	0	1	0	0	0	0	0	1	1	1	1	1	1	1	1	1	1	1	1	1	1	0	1	1
90	6	0	0	2	1	1	2	1	0	1	1	1	1	1	1	1	1	1	4	1	1	1	1.23077	1	1	1.75
92	6	1	0	1	1	1	5	1	1	3	1	1	1	1	1	1	1	1	1	3	1	1	1.30769	1	1.22222	1.5
97	5	1	1	1	0	0	3	1	1	3	3	3	1	1	3	3	1	1	3	3	3	1	2.23077	0	2.11111	2.5
103	6	0	1	2	0	0	0	0	0	1	1	1	1	1	1	1	1	1	1	1	1	1	1	0	1	1
104	6	1	0	1	0	0	0	0	0	3	1	1	3	1	1	1	1	1	1	1	1	1	1.30769	0	1.44444	1
105	5	1	0	2	0	1	3	1	0	2	1	1	1	1	1	1	2	2	1	3	2	2	1.53846	1	1.33333	2
111	5	0	0	1	1	0	0	0	0	1	1	1	1	1	1	1	1	1	1	1	1	1	1	0	1	1
113	6	1	0	2	1	1	2	1	1	3	2	3	4	1	2	1	4	1	2	3	5	2	2.53846	1	2.33333	3
115	6	1	1	2	0	1	0	0	0	1	1	1	1	1	1	1	1	1	1	1	1	1	1	1	1	1
121	5	0	1	2	0	0	4	0	0	3	1	1	1	1	1	1	2	2	1	3	2	2	1.61539	0	1.44444	2
123	6	0	0	2	1	1	0	0	0	1	1	1	1	1	1	1	1	1	1	1	1	1	1	2	1	1
128	5	1	0	1	0	1	9	1	1	4	3	4	2	2	3	1	1	1	3	3	3	2	2.46154	1	2.33333	2.75
130	6	0	1	2	0	1	0	0	1	2	3	1	3	1	1	3	1	1	1	1	3	1	1.69231	1	1.77778	1.5
141	5	0	#NULL!	1	1	1	3	1	0	2	1	1	1	1	1	1	3	3	1	1	3	3	1.69231	2	1.55556	2
153	6	0	1	2	0	0	2	1	0	1	1	1	1	1	1	1	1	1	2	1	1	1	1.07692	0	1	1.25
156	5	0	0	2	0	0	4	1	0	2	2	1	1	1	1	1	1	1	2	1	1	2	1.30769	0	1.22222	1.5
157	5	0	1	2	0	0	4	1	0	1	1	1	1	1	1	1	1	1	1	1	1	1	1	0	1	1
160	5	0	#NULL!	1	1	1	2	1	0	2	1	1	5	1	1	3	3	1	1	1	1	1	1.69231	1	2	1
164	5	1	#NULL!	2	0	0	10	1	1	4	4	4	4	4	4	3	3	3	2	2	3	1	3.15385	0	3.66667	2
169	5	1	0	1	0	0	2	1	1	3	4	3	1	1	3	3	2	2	1	1	1	1	2	0	2.44444	1
173	5	1	0	2	0	0	2	1	0	1	1	1	2	1	1	1	1	1	3	3	1	1	1.38461	0	1.11111	2
177	6	0	1	2	1	1	2	1	0	2	1	1	1	1	1	1	1	1	1	1	1	1	1.07692	1	1.11111	1
178	5	0	1	2	1	0	0	0	0	1	1	1	1	1	1	1	1	1	1	1	1	1	1	0	1	1
182	5	1	1	1	1	1	10	1	1	3	3	2	4	3	3	3	2	3	3	5	2	4	3.07692	1	2.88889	3.5
189	5	0	1	2	1	0	6	1	0	3	2	2	2	1	1	3	3	1	3	3	1	3	2.15385	0	2	2.5
190	5	0	0	2	1	0	8	1	1	2	1	3	1	1	1	1	1	1	1	1	1	1	1.23077	0	1.33333	1
194	5	0	1	1	1	0	3	1	0	1	2	1	2	1	1	1	1	1	1	1	1	1	1.15385	0	1.22222	1
196	6	0	1	2	0	0	3	1	0	3	1	1	1	1	1	1	1	1	1	1	1	1	1.15385	0	1.22222	1
197	6	1	1	2	0	1	3	1	0	1	1	1	1	1	1	1	1	1	1	3	1	1	1.15385	1	1	1.5
199	5	0	1	2	0	0	0	0	1	1	1	1	1	1	1	1	1	1	1	1	1	1	1	0	1	1
200	5	0	1	2	1	0	3	1	0	2	1	1	2	1	1	1	1	1	2	1	1	1	1.23077	0	1.22222	1.25
201	5	1	0	1	0	0	2	1	1	2	3	1	1	1	1	1	2	1	1	1	1	1	1.30769	0	1.44444	1
202	6	0	0	2	0	0	2	1	0	3	3	2	1	1	1	1	3	3	1	1	3	3	2	0	2	2
203	5	0	1	2	0	0	13	1	1	3	3	3	2	2	3	3	4	1	2	1	1	1	2.23077	0	2.66667	1.25
206	5	1	1	2	1	1	4	1	1	3	3	3	4	1	1	5	1	1	1	1	2	3	2.23077	1	2.44444	1.75
207	5	1	0	1	1	0	2	1	0	1	1	1	1	1	1	1	1	1	1	3	1	1	1.15385	0	1	1.5
209	5	0	0	3	0	0	4	1	0	1	1	1	3	1	1	1	1	1	1	1	1	1	1.15385	0	1.22222	1
212	6	0	1	1	1	1	4	1	0	2	2	2	1	3	2	1	1	1	1	1	3	1	1.61539	1	1.66667	1.5
219	5	0	1	4	1	0	0	0	0	1	1	1	1	1	1	1	1	2	1	2	1	1	1.15385	0	1.11111	1.25
220	5	1	0	1	0	0	0	0	0	1	1	1	1	1	1	1	1	1	1	1	1	1	1	0	1	1
221	5	1	1	2	1	0	0	0	0	1	1	1	1	1	1	1	1	1	1	1	1	1	1	0	1	1
222	6	0	0	2	0	0	0	0	0	1	1	1	1	1	1	1	1	1	1	1	1	1	1	0	1	1
223	5	0	0	2	1	1	1	1	0	2	1	1	1	3	1	1	1	1	1	2	3	3	1.61539	1	1.33333	2.25
224	5	0	1	1	0	0	1	1	1	3	3	3	1	2	1	1	3	1	3	2	1	3	2.07692	0	2	2.25
225	5	1	1	2	1	0	3	1	1	4	3	3	2	3	4	3	3	3	3	2	2	3	2.92308	0	3.11111	2.5
229	5	0	1	2	0	0	4	1	0	4	4	4	1	3	1	4	1	1	1	3	1	1	2.23077	0	2.55556	1.5
231	5	1	0	1	0	0	2	1	1	1	1	1	1	1	3	1	1	1	1	1	1	1	1.15385	0	1.22222	1
232	6	0	1	2	0	0	4	1	0	3	3	3	1	3	3	2	1	1	3	3	3	2	2.38462	0	2.22222	2.75
233	5	1	1	1	0	0	4	1	1	3	1	1	1	1	1	1	1	1	3	4	1	1	1.53846	0	1.22222	2.25
235	6	0	1	2	1	1	0	0	0	1	1	1	1	1	1	1	1	1	1	1	1	1	1	1	1	1
237	6	0	0	2	0	0	1	1	0	2	1	1	1	1	1	1	1	1	1	1	1	1	1.07692	0	1.11111	1
238	5	1	0	2	0	1	2	1	0	2	1	1	1	1	1	1	2	1	1	1	1	1	1.15385	1	1.22222	1
243	5	0	0	2	1	1	0	0	0	2	1	1	1	1	1	1	1	1	1	1	1	1	1.07692	1	1.11111	1
248	6	1	1	2	1	1	4	1	1	3	3	2	2	2	1	2	3	3	1	1	2	2	2.07692	1	2.33333	1.5
262	5	0	1	3	0	0	4	1	1	2	2	2	2	1	1	1	3	3	1	1	3	3	1.92308	0	1.88889	2
263	6	0	1	#NULL!	0	1	1	1	0	1	2	1	1	1	1	1	2	2	1	2	2	2	1.46154	1	1.33333	1.75
264	6	1	1	3	0	1	1	1	0	3	3	1	1	1	1	1	1	1	1	1	1	1	1.30769	1	1.44444	1
268	6	0	1	2	1	1	3	1	0	1	1	1	3	3	1	3	1	1	1	1	2	1	1.53846	1	1.66667	1.25
272	5	0	1	1	1	1	3	1	0	3	3	3	1	2	1	1	1	1	1	1	3	3	1.84615	1	1.77778	2
281	5	0	1	2	1	1	0	0	0	2	1	4	2	1	1	1	1	1	2	5	1	4	2	1	1.55556	3
285	5	0	0	3	1	1	3	1	0	2	3	2	1	1	1	1	1	1	1	1	1	1	1.30769	1	1.44444	1
294	5	1	1	2	1	1	3	1	0	2	2	1	3	1	1	1	1	1	1	1	1	1	1.30769	1	1.44444	1
305	5	1	1	2	1	1	2	1	0	2	2	1	1	1	1	1	1	1	1	1	1	1	1.15385	1	1.22222	1
306	5	0	1	2	1	1	0	0	0	1	2	1	1	1	1	1	1	1	1	1	1	1	1.07692	1	1.11111	1
309	5	1	0	2	1	1	3	1	1	3	1	3	1	1	1	3	1	1	1	1	1	1	1.46154	1	1.66667	1
310	5	1	1	2	1	1	3	1	0	2	1	2	1	1	1	1	1	1	1	1	1	1	1.15385	1	1.22222	1
311	5	0	0	1	1	1	0	0	0	1	1	1	1	1	1	1	1	1	1	1	1	1	1	1	1	1
321	5	1	1	1	1	1	0	0	0	1	1	1	1	1	1	1	1	1	1	1	1	1	1	2	1	1
325	5	0	0	2	0	1	0	0	0	1	1	1	1	1	1	1	1	1	1	1	1	1	1	1	1	1
327	5	1	1	2	1	1	0	0	0	1	1	1	1	1	1	1	1	1	1	1	1	1	1	1	1	1
328	6	1	1	2	1	1	3	1	1	3	2	3	2	2	3	3	1	1	2	3	1	1	2.07692	1	2.22222	1.75
329	6	1	0	1	1	1	0	0	0	1	1	1	1	1	1	1	1	1	1	1	1	1	1	1	1	1
330	5	0	1	1	1	1	0	0	0	1	1	1	1	1	1	1	1	1	1	1	1	1	1	1	1	1
331	5	1	0	1	1	0	3	1	0	3	2	1	1	1	2	2	1	1	2	3	1	3	1.76923	0	1.55556	2.25
336	5	0	0	2	1	0	2	1	1	2	2	2	2	2	2	2	2	2	2	2	2	2	2	0	2	2
341	5	1	1	2	1	1	4	1	0	3	1	2	1	1	1	2	1	1	1	2	1	3	1.53846	1	1.44444	1.75
342	5	0	1	1	1	0	1	1	0	1	2	1	1	1	1	1	1	1	1	1	1	1	1.07692	0	1.11111	1
345	6	1	1	4	0	0	3	1	0	4	1	1	1	1	2	3	2	1	1	1	1	1	1.53846	0	1.77778	1
349	5	0	1	2	1	1	0	0	0	1	1	1	1	1	1	1	1	1	1	1	1	3	1.15385	1	1	1.5
351	6	1	1	4	1	0	0	0	0	2	1	1	1	1	1	1	1	1	1	1	1	1	1.07692	0	1.11111	1
352	5	1	#NULL!	2	0	0	8	1	1	3	2	3	2	3	3	2	1	1	1	3	3	3	2.30769	0	2.22222	2.5
355	5	1	1	2	1	1	0	0	0	1	1	1	1	1	1	1	1	1	1	1	1	1	1	1	1	1
357	5	0	1	2	1	1	0	0	0	1	1	1	1	1	1	1	1	1	1	1	1	1	1	1	1	1
358	6	1	1	2	1	1	4	1	0	3	3	3	1	3	1	5	1	5	1	1	1	3	2.38462	1	2.77778	1.5
359	6	1	1	2	0	1	2	1	0	3	2	2	2	1	2	2	1	1	1	1	1	1	1.53846	1	1.77778	1
362	5	0	1	2	1	1	2	1	0	3	1	1	1	1	1	1	1	1	1	1	1	1	1.15385	1	1.22222	1
363	5	0	1	1	1	1	2	1	1	2	1	1	1	1	1	1	1	1	1	1	1	1	1.07692	1	1.11111	1
364	5	0	0	2	1	1	2	1	0	3	2	2	1	3	3	2	1	2	1	1	2	1	1.84615	1	2.11111	1.25
365	5	0	0	2	1	0	2	1	1	3	3	3	1	1	1	1	1	1	1	3	1	1	1.61539	0	1.66667	1.5
369	6	1	1	2	1	1	5	1	0	3	3	3	3	1	4	2	4	2	1	1	1	1	2.23077	1	2.77778	1
372	5	1	0	1	1	0	2	1	0	3	3	3	2	1	3	3	3	3	1	3	1	1	2.30769	0	2.66667	1.5
373	5	1	1	3	1	0	4	1	0	4	1	1	4	1	1	3	1	1	5	1	4	1	2.15385	0	1.88889	2.75
374	5	1	1	1	1	0	1	1	0	3	1	1	1	1	1	1	1	1	1	1	1	1	1.15385	0	1.22222	1
375	5	1	1	2	1	0	3	1	0	3	1	3	1	3	1	1	1	1	1	1	3	1	1.61539	0	1.66667	1.5
376	5	0	1	2	1	1	2	1	1	3	3	3	4	4	3	3	2	2	2	3	3	1	2.76923	1	3	2.25
377	5	1	1	2	1	0	2	1	0	3	2	3	1	1	3	1	1	1	1	1	1	1	1.53846	0	1.77778	1
380	6	1	1	1	1	1	0	0	0	1	1	1	1	1	1	1	1	1	1	1	1	1	1	1	1	1
382	5	0	1	3	1	0	6	1	0	2	1	1	3	1	1	1	1	1	3	4	1	1	1.61539	0	1.33333	2.25
383	5	1	1	4	1	1	0	0	0	1	1	1	1	1	1	1	1	1	1	1	1	1	1	1	1	1
384	5	1	1	2	1	0	5	1	1	2	1	2	1	1	1	1	2	1	1	1	1	1	1.23077	0	1.33333	1
385	5	1	1	1	0	0	3	1	1	3	1	1	1	1	1	3	1	1	3	1	1	1	1.46154	0	1.44444	1.5
386	6	0	1	2	0	1	0	0	0	1	1	1	1	1	1	1	1	1	1	1	1	1	1	1	1	1
387	5	1	1	3	0	0	0	0	0	2	1	1	1	1	1	1	1	1	1	1	1	1	1.07692	0	1.11111	1
388	5	1	1	2	1	1	0	0	0	1	1	1	1	1	1	1	1	1	1	1	1	1	1	1	1	1
395	5	0	0	2	0	1	1	1	0	2	1	1	1	1	1	1	1	1	1	2	1	1	1.15385	1	1.11111	1.25
396	6	1	1	2	0	1	0	0	0	1	1	1	1	1	1	1	1	1	1	1	1	2	1.07692	1	1	1.25
400	6	0	1	2	1	0	0	0	0	2	1	1	1	1	1	1	1	1	1	1	1	1	1.07692	0	1.11111	1
409	5	1	1	1	1	0	6	1	1	3	1	1	1	3	1	3	1	1	1	1	1	1	1.46154	0	1.66667	1
413	6	0	1	2	1	0	0	0	1	2	1	1	1	2	1	1	1	1	1	1	1	1	1.15385	0	1.22222	1
424	5	0	1	2	0	0	0	0	0	1	1	1	1	1	1	1	1	1	1	1	1	1	1	0	1	1
427	5	1	1	1	1	1	1	1	0	2	1	2	1	1	1	1	1	1	1	3	1	1	1.30769	1	1.22222	1.5
429	6	0	0	2	1	1	0	0	0	2	2	3	3	1	1	1	1	1	1	1	1	1	1.46154	1	1.66667	1
431	6	1	1	2	1	1	4	1	1	1	1	3	1	1	1	2	2	1	1	1	1	2	1.38461	1	1.44444	1.25
432	5	1	1	2	1	1	0	0	0	2	1	2	1	2	4	1	1	1	1	3	1	1	1.61539	1	1.66667	1.5
433	5	1	0	2	1	1	0	0	0	2	2	2	1	1	1	1	1	1	1	1	1	1	1.23077	1	1.33333	1
437	5	1	1	1	1	1	0	0	0	3	2	2	1	1	1	1	1	1	1	1	1	1	1.30769	1	1.44444	1
438	6	1	1	2	1	1	0	0	0	1	1	1	1	1	1	1	1	1	1	1	1	3	1.15385	1	1	1.5
443	5	1	1	2	0	0	0	0	0	1	1	1	3	1	1	1	1	1	1	1	1	1	1.15385	0	1.22222	1
446	5	0	1	3	1	1	0	0	0	1	2	1	1	1	1	1	1	1	1	1	1	1	1.07692	1	1.11111	1
455	5	1	0	2	0	0	1	1	0	4	2	2	4	1	1	1	1	1	1	1	1	2	1.69231	0	1.88889	1.25
457	6	1	0	2	1	0	2	1	0	4	1	2	3	1	1	3	1	1	2	3	1	1	1.84615	0	1.88889	1.75
458	6	1	1	1	0	0	6	1	1	1	2	2	1	1	1	1	1	1	1	1	1	1	1.15385	0	1.22222	1
472	6	1	0	1	0	0	4	1	1	1	3	1	1	1	1	2	5	5	2	5	2	1	2.30769	0	2.22222	2.5
476	5	0	1	2	0	0	0	0	1	1	1	1	1	1	1	1	1	1	1	1	1	1	1	0	1	1
482	5	1	0	1	1	0	0	0	0	2	1	1	1	1	1	1	1	1	1	1	1	1	1.07692	0	1.11111	1
497	5	0	1	1	1	0	0	0	0	3	1	1	1	1	1	1	1	1	1	1	1	1	1.15385	0	1.22222	1
498	6	1	0	1	0	1	0	0	0	3	1	1	1	1	1	1	1	1	1	1	1	1	1.15385	2	1.22222	1
499	6	1	1	2	1	1	0	0	0	1	1	1	1	1	1	1	1	1	1	1	1	1	1	2	1	1
501	6	0	1	1	0	1	0	0	0	2	2	2	1	1	1	1	1	1	1	1	1	1	1.23077	1	1.33333	1
502	6	1	1	1	1	0	1	1	0	2	1	1	1	1	1	1	1	1	1	1	1	1	1.07692	0	1.11111	1
505	5	0	1	3	1	0	0	0	0	1	1	1	1	1	1	1	1	1	1	1	1	1	1	0	1	1
506	6	0	1	2	1	0	0	0	1	3	1	1	2	1	1	1	3	1	1	1	1	1	1.38461	0	1.55556	1
507	6	1	1	2	1	0	0	0	0	1	1	1	1	1	1	1	1	1	1	1	1	1	1	0	1	1
509	5	0	1	2	1	1	0	0	0	1	1	1	1	1	1	1	1	1	1	1	1	1	1	2	1	1
511	5	1	1	2	1	1	0	0	0	1	1	1	1	1	1	1	1	1	1	1	1	1	1	1	1	1
512	5	1	0	2	0	1	0	0	0	1	1	1	1	1	1	1	1	1	1	1	1	1	1	2	1	1
514	6	0	0	3	0	0	0	0	0	1	1	1	1	1	1	1	1	1	1	1	1	1	1	0	1	1
515	5	1	1	2	1	1	0	0	0	1	1	1	1	1	1	1	1	1	1	1	1	1	1	1	1	1
518	5	0	1	1	1	1	2	1	0	1	1	2	3	1	1	1	1	1	1	1	1	1	1.23077	1	1.33333	1
519	6	0	1	2	1	1	4	1	1	3	2	1	1	1	1	1	1	1	3	1	1	1	1.38461	1	1.33333	1.5
520	5	0	1	2	1	1	0	0	0	1	1	1	1	1	1	1	1	1	1	1	1	1	1	1	1	1
521	6	0	1	2	0	1	0	0	0	1	1	1	1	1	1	1	1	1	1	1	1	1	1	1	1	1
525	5	0	1	#NULL!	0	1	1	1	0	2	1	2	1	1	1	1	1	1	1	1	1	1	1.15385	1	1.22222	1
527	5	0	0	2	0	1	0	0	0	1	1	1	1	1	1	1	1	1	1	1	1	1	1	1	1	1
528	5	0	0	1	1	1	3	1	0	2	1	1	1	1	1	1	1	1	3	1	3	1	1.38461	1	1.11111	2
535	5	1	1	2	1	1	0	0	0	1	1	3	1	3	1	1	3	1	1	1	1	1	1.46154	1	1.66667	1
537	5	0	1	2	1	1	0	0	0	1	1	1	1	1	1	1	1	1	1	1	1	1	1	1	1	1
538	6	1	1	2	1	1	0	0	0	2	1	1	1	1	1	1	1	1	1	1	1	1	1.07692	1	1.11111	1
541	6	1	1	2	1	0	0	0	0	1	1	2	1	1	1	2	1	1	1	1	1	1	1.15385	0	1.22222	1
542	6	1	1	2	0	1	0	0	0	1	1	1	1	1	1	2	1	1	2	2	1	2	1.30769	1	1.11111	1.75
543	6	0	0	2	1	1	1	1	0	1	1	4	3	3	1	3	1	3	3	3	3	1	2.30769	1	2.22222	2.5
544	6	1	1	2	1	1	0	0	0	2	1	1	1	1	1	1	1	1	1	1	1	1	1.07692	1	1.11111	1
545	5	1	0	2	1	1	0	0	0	1	2	1	1	1	1	1	1	1	1	1	1	1	1.07692	1	1.11111	1
546	6	1	1	2	0	1	4	1	1	3	3	3	3	3	3	3	3	2	3	4	1	2	2.76923	1	2.88889	2.5
549	5	0	0	2	0	1	0	0	0	2	1	1	2	1	1	1	1	2	1	1	1	1	1.23077	1	1.33333	1
550	6	0	1	2	0	0	0	0	0	2	1	1	1	1	1	2	1	1	1	1	1	2	1.23077	0	1.22222	1.25
552	5	1	1	2	0	0	0	0	0	1	1	1	1	1	1	1	1	1	1	1	1	1	1	0	1	1
553	6	1	1	2	0	0	0	0	0	1	2	1	1	1	1	1	1	1	1	1	1	1	1.07692	0	1.11111	1
554	6	0	1	2	1	1	0	0	0	1	1	1	3	3	1	1	1	1	1	3	3	2	1.69231	2	1.44444	2.25
555	6	0	1	2	1	1	0	0	0	1	1	1	1	1	1	1	1	1	1	1	1	1	1	1	1	1
560	5	0	#NULL!	2	#NULL!	0	6	1	1	3	3	2	2	3	3	3	2	2	3	3	2	2	2.53846	0	2.55556	2.5
561	5	0	#NULL!	2	1	0	9	1	1	4	4	5	3	3	3	2	2	2	3	3	2	2	2.92308	0	3.11111	2.5
567	5	1	1	2	0	1	0	0	0	1	1	1	1	1	1	1	1	1	1	1	1	2	1.07692	1	1	1.25
569	5	1	0	1	0	0	0	0	0	1	1	1	1	1	1	1	1	1	1	1	1	1	1	0	1	1
572	6	1	1	2	1	1	3	1	1	3	3	3	1	1	1	1	1	1	1	1	1	1	1.46154	1	1.66667	1
575	5	1	1	2	1	1	0	0	0	1	1	1	1	1	1	1	1	1	1	1	1	1	1	1	1	1
577	5	0	0	1	#NULL!	0	0	0	0	1	1	1	1	1	1	1	5	5	5	1	1	1	1.92308	0	1.88889	2
578	5	1	1	1	1	0	2	1	1	3	2	2	3	2	2	2	3	2	1	1	2	2	2.07692	0	2.33333	1.5
579	5	0	0	1	1	1	0	0	0	1	1	1	1	1	1	1	1	1	1	3	1	1	1.15385	1	1	1.5
581	6	0	1	2	1	1	0	0	0	2	2	1	1	1	1	1	1	1	1	1	1	1	1.15385	2	1.22222	1
582	5	0	0	1	1	1	0	0	0	1	1	1	1	1	1	1	1	1	1	1	1	1	1	1	1	1
586	5	1	1	2	1	1	0	0	0	2	1	2	1	1	1	2	1	1	1	1	1	1	1.23077	1	1.33333	1
587	5	0	0	2	0	0	3	1	1	2	1	1	2	1	1	1	3	3	1	4	3	3	2	0	1.66667	2.75
589	6	1	0	1	1	0	1	1	0	1	1	1	1	1	1	1	2	2	3	1	2	2	1.46154	0	1.22222	2
598	6	0	1	2	1	1	0	0	0	1	1	1	1	1	1	1	1	1	1	1	1	1	1	2	1	1
603	5	1	0	1	0	0	2	1	1	1	1	1	1	1	1	1	5	3	1	1	3	3	1.76923	0	1.66667	2
607	5	0	0	2	1	1	0	0	1	1	1	1	1	1	1	1	1	1	1	1	1	1	1	1	1	1
611	4	0	1	2	0	0	0	0	0	1	1	1	1	1	1	1	1	1	1	1	1	1	1	0	1	1
613	5	0	1	2	0	0	0	0	0	2	1	1	1	1	1	1	1	1	3	1	1	1	1.23077	0	1.11111	1.5
614	6	1	1	3	1	1	0	0	0	1	1	1	1	1	1	1	1	1	1	1	1	1	1	1	1	1
615	6	0	1	2	1	1	0	0	0	1	3	2	1	2	2	1	1	1	1	1	1	1	1.38461	1	1.55556	1
618	6	0	1	3	1	1	0	0	0	2	1	1	1	1	1	1	1	1	1	1	1	1	1.07692	1	1.11111	1
619	5	1	1	1	0	0	3	1	1	4	3	4	3	1	4	4	3	4	2	5	5	4	3.53846	0	3.33333	4
621	5	1	0	2	1	0	0	0	0	3	2	1	1	1	1	1	1	1	1	1	1	1	1.23077	0	1.33333	1
623	6	1	0	1	0	0	2	1	1	4	3	3	2	2	3	3	1	2	3	5	3	1	2.69231	0	2.55556	3
642	6	1	1	2	1	1	0	0	0	2	1	1	1	1	1	2	1	1	3	3	3	1	1.61539	1	1.22222	2.5
648	6	1	1	2	1	1	0	0	0	3	1	1	1	1	1	1	1	1	1	1	1	1	1.15385	2	1.22222	1
649	6	0	1	2	1	1	0	0	0	2	1	1	1	1	1	1	1	1	1	1	1	1	1.07692	1	1.11111	1
651	6	0	0	2	0	1	0	0	0	2	1	1	1	3	1	1	1	1	1	1	1	1	1.23077	1	1.33333	1
655	6	1	1	1	0	0	0	0	0	1	1	1	1	1	1	1	1	1	1	1	1	1	1	0	1	1
657	6	0	1	1	1	0	0	0	0	1	1	1	2	1	1	1	1	1	2	2	2	2	1.38461	0	1.11111	2
659	5	1	#NULL!	2	1	1	0	0	0	1	2	1	1	1	1	1	1	1	1	1	1	1	1.07692	1	1.11111	1
742	5	1	0	1	1	0	0	0	0	2	1	1	1	2	1	1	1	1	1	1	1	1	1.15385	0	1.22222	1
745	6	0	0	1	1	0	0	0	0	2	3	3	1	3	1	1	1	1	1	3	1	1	1.69231	0	1.77778	1.5
748	5	0	1	2	1	1	0	0	0	1	1	1	1	1	1	1	1	1	1	1	1	1	1	1	1	1
750	5	1	1	2	1	0	0	0	0	1	1	1	1	1	1	1	1	1	1	1	1	1	1	0	1	1
751	5	1	0	2	0	0	0	0	0	2	1	1	1	1	1	1	1	1	1	1	1	1	1.07692	0	1.11111	1
752	6	1	1	1	1	0	1	1	1	3	2	3	1	1	1	1	3	3	3	1	3	3	2.15385	0	2	2.5
753	6	0	1	1	1	0	2	1	1	3	3	3	2	2	3	3	2	2	3	4	4	4	2.92308	0	2.55556	3.75
754	5	0	0	1	1	0	1	1	0	3	1	1	1	1	1	1	2	2	1	3	3	2	1.69231	0	1.44444	2.25
763	6	0	0	2	1	1	0	0	0	3	2	2	1	2	1	2	1	1	4	4	1	1	1.92308	1	1.66667	2.5
766	6	0	1	1	0	0	0	0	0	4	3	3	4	4	3	3	3	3	4	4	4	3	3.46154	0	3.33333	3.75
767	6	0	0	1	1	0	5	1	1	1	1	2	1	1	1	1	2	3	3	1	2	3	1.69231	0	1.44444	2.25
769	6	0	0	1	1	0	1	1	0	3	2	2	2	1	1	1	2	2	1	1	2	2	1.69231	0	1.77778	1.5
770	6	0	1	2	0	0	1	1	0	1	2	1	1	2	1	1	1	1	1	1	1	1	1.15385	0	1.22222	1
771	5	1	#NULL!	1	1	0	9	1	1	1	1	1	1	1	1	1	2	2	1	1	2	2	1.30769	0	1.22222	1.5
773	6	1	1	2	0	0	0	0	0	2	1	1	1	1	1	1	3	3	5	5	2	2	2.15385	0	1.55556	3.5
775	5	0	1	3	1	0	4	1	1	1	2	1	1	1	1	1	2	3	1	1	2	3	1.53846	0	1.44444	1.75
779	5	0	0	2	1	1	0	0	0	2	1	1	1	1	1	1	1	1	1	1	1	1	1.07692	1	1.11111	1
780	5	0	1	2	0	1	3	1	1	3	1	1	1	1	1	1	2	2	3	1	1	1	1.46154	1	1.44444	1.5
781	5	1	0	1	0	0	5	1	1	4	4	4	4	4	4	4	4	4	4	4	4	4	4	0	4	4
783	6	1	1	2	1	1	1	1	0	4	1	1	1	3	3	3	2	2	3	1	1	1	2	1	2.22222	1.5
785	5	1	0	2	0	0	2	1	0	2	2	1	1	1	1	1	3	3	1	1	1	1	1.46154	0	1.66667	1
789	6	0	1	2	1	0	3	1	1	1	3	1	2	1	1	1	1	1	3	3	2	3	1.76923	0	1.33333	2.75
791	6	0	0	2	1	1	4	1	1	1	2	1	1	1	1	1	1	1	1	1	1	1	1.07692	1	1.11111	1
797	6	1	1	2	1	1	0	0	0	4	2	2	2	2	1	1	2	2	2	3	4	1	2.15385	1	2	2.5
801	5	0	0	2	0	0	0	0	1	1	1	1	3	1	1	1	1	1	1	1	1	1	1.15385	0	1.22222	1
807	5	0	1	1	1	1	0	0	0	3	1	1	1	1	1	1	1	1	5	2	3	1	1.69231	1	1.22222	2.75
809	6	1	1	2	0	0	2	1	1	2	1	1	1	1	3	1	1	1	5	5	3	5	2.30769	0	1.33333	4.5
814	5	1	1	2	1	1	0	0	0	3	1	1	1	2	1	1	1	1	1	3	1	3	1.53846	1	1.33333	2
817	6	1	1	2	0	0	0	0	0	3	3	1	1	1	1	1	1	1	1	1	1	1	1.30769	0	1.44444	1
818	6	1	0	2	1	0	0	0	0	1	1	1	1	1	1	1	1	1	1	1	1	1	1	0	1	1
819	6	1	1	2	0	1	0	0	0	3	2	1	1	1	1	2	1	1	1	1	1	1	1.30769	1	1.44444	1
820	5	0	1	2	1	0	0	0	0	3	2	2	1	1	1	1	1	1	1	1	1	3	1.46154	0	1.44444	1.5
821	6	0	1	1	1	0	0	0	0	1	1	1	1	1	1	1	1	1	1	1	1	1	1	0	1	1
822	6	0	1	2	0	0	0	0	0	1	1	1	1	1	1	1	1	1	3	2	2	1	1.30769	0	1	2
825	6	0	1	2	0	0	0	0	0	1	1	1	1	2	1	1	1	1	1	1	1	1	1.07692	0	1.11111	1
827	6	0	1	1	1	1	0	0	0	1	1	1	1	1	1	1	1	1	1	1	1	1	1	2	1	1
828	6	1	1	2	1	1	0	0	0	1	1	1	1	1	1	2	1	1	1	1	1	2	1.15385	1	1.11111	1.25
834	5	1	0	2	1	0	0	0	0	1	1	1	1	1	1	1	1	1	1	1	1	1	1	0	1	1
835	6	1	0	1	1	0	0	0	1	2	1	2	1	1	1	1	1	1	1	1	1	1	1.15385	0	1.22222	1
836	5	0	0	1	0	0	0	0	0	1	1	1	1	1	1	1	1	1	1	1	1	1	1	0	1	1
838	5	0	1	2	0	0	0	0	0	1	3	2	1	1	1	1	1	1	1	1	1	1	1.23077	0	1.33333	1
842	6	0	1	2	1	0	2	1	1	3	1	1	1	1	1	3	1	1	5	4	1	1	1.84615	0	1.44444	2.75
843	6	0	0	1	1	1	3	1	1	3	1	3	1	3	1	1	1	1	1	1	2	1	1.53846	2	1.66667	1.25
847	6	0	0	1	1	0	1	1	0	2	1	1	1	1	1	1	1	1	1	1	1	1	1.07692	0	1.11111	1
975	5	1	1	2	1	1	0	0	0	1	1	1	1	1	1	1	1	1	1	1	1	1	1	1	1	1
976	5	1	1	3	1	0	2	1	0	3	3	3	1	3	3	3	1	3	1	1	1	1	2.07692	0	2.55556	1
977	6	0	0	1	1	0	3	1	1	3	3	3	2	1	1	2	1	2	2	2	1	1	1.84615	0	2	1.5
978	6	1	0	1	1	1	2	1	0	3	2	2	1	1	1	1	1	2	1	1	1	1	1.38461	1	1.55556	1
979	5	1	1	2	1	0	4	1	0	3	2	1	2	1	3	1	1	2	1	1	1	1	1.53846	0	1.77778	1
980	5	1	1	1	1	0	1	1	0	2	2	1	1	2	1	2	1	2	1	1	2	1	1.46154	0	1.55556	1.25
982	5	1	1	2	1	1	0	0	0	1	1	1	1	1	1	1	1	1	1	1	1	1	1	1	1	1
983	6	0	1	2	1	1	0	0	0	3	1	1	1	1	1	1	1	1	1	1	1	1	1.15385	1	1.22222	1
984	4	1	1	2	1	1	5	1	0	3	3	2	1	1	1	3	1	2	1	1	2	1	1.69231	1	1.88889	1.25
985	6	0	0	2	1	0	4	1	1	3	3	3	1	3	3	3	1	2	1	3	3	4	2.53846	0	2.44444	2.75
986	6	0	1	2	1	1	0	0	0	1	1	1	1	1	1	1	1	1	1	1	1	1	1	1	1	1
987	6	1	1	2	1	0	6	1	1	3	3	3	1	1	1	3	1	3	2	1	1	1	1.84615	0	2.11111	1.25
988	6	0	1	1	1	1	0	0	0	1	1	1	1	1	1	1	1	1	1	1	1	1	1	1	1	1
990	5	1	0	1	1	1	2	1	1	3	3	3	1	3	2	2	1	2	3	3	3	1	2.30769	1	2.22222	2.5
992	4	1	0	1	0	1	0	0	0	1	1	1	1	1	1	1	1	1	1	1	1	1	1	1	1	1
995	4	0	1	2	1	0	0	0	0	1	1	1	1	1	1	1	1	1	1	1	1	1	1	0	1	1
996	4	1	1	3	0	1	0	0	0	3	1	1	1	1	1	1	1	1	1	1	1	1	1.15385	1	1.22222	1
997	4	0	0	1	1	0	0	0	0	1	2	1	1	1	1	1	1	1	1	1	1	1	1.07692	0	1.11111	1
998	4	0	0	3	1	0	2	1	0	3	3	3	1	2	2	3	1	2	1	1	1	1	1.84615	0	2.22222	1
999	4	0	#NULL!	1	0	0	0	0	0	1	1	1	1	1	1	1	1	1	1	1	1	1	1	0	1	1
1000	4	0	0	2	1	1	0	0	0	1	1	1	1	1	1	1	1	1	1	1	1	1	1	1	1	1
1003	4	0	1	2	1	0	0	0	0	3	1	1	1	1	1	1	1	1	1	1	1	1	1.15385	0	1.22222	1
1005	4	1	1	1	1	0	0	0	0	1	3	1	1	1	1	1	1	1	1	1	1	1	1.15385	0	1.22222	1
1006	4	1	1	2	1	1	0	0	0	2	1	1	1	1	1	1	1	1	1	1	1	1	1.07692	1	1.11111	1
1012	4	0	1	2	0	1	0	0	0	1	1	3	1	1	1	1	1	1	1	1	1	1	1.15385	1	1.22222	1
1013	4	0	0	2	1	0	0	0	0	1	3	1	1	1	1	1	1	1	1	1	1	1	1.15385	0	1.22222	1
1017	5	0	0	2	#NULL!	0	2	1	0	3	3	3	3	1	4	4	4	3	1	3	1	1	2.61538	0	3.11111	1.5
1019	5	1	1	2	0	1	0	0	0	1	1	1	1	1	1	1	1	1	1	1	1	1	1	1	1	1
1022	5	1	1	2	0	0	0	0	0	1	1	1	1	1	1	1	1	1	1	1	1	1	1	0	1	1
1025	5	0	1	2	1	1	0	0	0	1	1	1	1	1	1	1	1	1	1	1	1	1	1	1	1	1
1026	5	0	1	2	1	0	4	1	1	2	1	1	3	1	3	1	1	3	2	3	1	1	1.76923	0	1.77778	1.75
1027	5	0	1	1	1	0	0	0	0	1	1	1	1	1	1	1	1	1	1	1	1	1	1	0	1	1
1028	5	0	0	2	1	0	0	0	0	1	2	1	1	1	1	1	1	1	1	1	1	1	1.07692	0	1.11111	1
1030	5	0	1	2	0	1	0	0	0	1	1	1	1	1	1	1	1	1	1	1	1	1	1	1	1	1
1031	5	1	1	2	0	0	0	0	0	1	1	1	1	1	1	1	1	1	1	1	1	1	1	0	1	1
1045	4	0	1	2	1	0	0	0	0	1	1	1	1	1	1	1	1	1	1	1	1	1	1	0	1	1
1047	4	0	0	1	1	0	0	0	0	1	1	2	1	1	1	1	1	1	1	1	1	2	1.15385	0	1.11111	1.25
1050	4	0	1	2	1	1	2	1	0	3	1	1	5	1	2	4	2	2	1	1	1	1	1.92308	1	2.33333	1
1056	4	0	0	2	1	0	0	0	0	1	1	1	3	1	1	1	1	1	1	1	1	1	1.15385	0	1.22222	1
1058	4	1	0	1	1	1	0	0	0	1	1	1	1	1	1	1	1	1	1	1	1	1	1	2	1	1
1100	4	1	1	2	0	0	0	0	0	1	1	1	1	1	1	1	1	1	1	1	1	1	1	0	1	1
1101	4	1	1	2	1	1	0	0	0	2	1	1	1	1	1	1	1	1	1	1	1	1	1.07692	1	1.11111	1
1102	4	1	0	2	1	1	0	0	0	3	3	1	1	1	1	1	1	1	1	1	1	1	1.30769	1	1.44444	1
1105	4	0	1	1	1	0	0	0	0	1	1	1	1	1	1	1	1	1	1	1	1	1	1	0	1	1
1108	4	1	1	2	0	0	0	0	0	1	1	1	1	1	1	1	1	1	2	1	1	1	1.07692	0	1	1.25
1110	4	0	0	2	1	0	0	0	0	1	1	1	1	1	1	1	1	1	1	1	1	1	1	0	1	1
1111	4	1	1	2	0	0	0	0	0	1	1	1	1	1	1	1	1	1	1	1	1	1	1	0	1	1
1112	4	1	0	1	1	0	0	0	0	1	1	1	1	1	1	1	1	1	1	1	1	1	1	0	1	1
1116	4	0	1	1	1	1	0	0	0	1	1	1	1	1	1	1	1	1	1	1	1	1	1	1	1	1
1119	4	0	#NULL!	3	1	0	0	0	0	3	1	1	1	1	2	1	1	1	2	4	1	1	1.53846	0	1.33333	2
1122	5	0	0	2	0	1	3	1	0	3	3	3	1	1	1	2	1	2	1	1	1	1	1.61539	1	1.88889	1
1123	5	1	0	2	0	1	0	0	0	1	1	1	1	1	1	1	1	1	1	1	1	1	1	1	1	1
1125	5	0	0	1	1	1	0	0	0	2	1	1	1	1	1	1	1	1	1	1	1	1	1.07692	1	1.11111	1
1126	5	1	1	2	1	1	0	0	0	1	1	1	1	1	1	1	1	1	1	1	1	1	1	2	1	1
1128	5	1	1	2	1	0	3	1	0	5	3	5	1	3	3	3	2	2	1	1	3	1	2.53846	0	3	1.5
1129	5	0	1	2	1	0	0	0	0	1	1	1	1	1	1	1	1	1	1	1	1	1	1	0	1	1
1132	5	0	1	2	1	1	2	1	0	2	2	2	2	1	2	2	2	2	1	2	1	1	1.69231	1	1.88889	1.25
1135	5	1	1	2	1	0	0	0	0	3	1	2	1	1	1	1	1	1	1	1	1	1	1.23077	0	1.33333	1
1136	5	0	1	1	1	1	1	1	0	2	1	3	1	1	1	1	2	2	1	5	1	1	1.69231	1	1.55556	2
1137	5	0	1	2	0	0	2	1	0	3	1	2	1	3	1	1	3	3	1	1	1	1	1.69231	0	2	1
1142	5	1	0	1	1	1	4	1	1	3	1	3	3	3	1	3	3	3	3	4	3	3	2.76923	1	2.55556	3.25
1145	4	0	1	2	1	1	0	0	0	1	1	1	1	1	1	1	1	1	1	1	1	1	1	1	1	1
1148	4	0	0	2	1	0	0	0	0	1	1	1	1	1	1	1	1	1	1	3	1	1	1.15385	0	1	1.5
1154	4	0	0	1	1	1	0	0	0	1	1	1	1	1	1	1	1	1	1	1	1	1	1	1	1	1
1157	4	0	1	2	1	1	0	0	0	1	1	1	1	1	1	1	1	1	1	1	1	1	1	1	1	1
1163	5	0	1	2	1	1	1	1	0	3	1	2	2	1	1	1	2	2	2	3	1	1	1.69231	1	1.66667	1.75
1164	5	1	1	2	1	0	0	0	0	1	1	1	1	1	1	1	1	1	1	1	1	1	1	0	1	1
1166	5	1	1	1	1	0	2	1	0	5	4	2	1	1	1	1	3	3	1	3	1	1	2.07692	0	2.33333	1.5
1168	5	1	0	2	0	0	5	1	0	1	1	3	4	1	3	3	4	4	4	5	1	1	2.69231	0	2.66667	2.75
1170	5	0	0	2	0	0	2	1	0	3	3	1	3	1	1	4	5	3	5	1	1	1	2.46154	0	2.66667	2
1171	5	0	1	1	1	0	0	0	0	1	1	1	1	1	1	1	1	1	1	1	1	1	1	0	1	1
1172	5	0	0	2	1	0	0	0	0	1	1	1	1	1	1	1	1	1	1	1	1	1	1	0	1	1
1174	5	1	1	3	0	0	0	0	0	3	2	2	1	3	1	1	1	1	1	1	2	1	1.53846	0	1.66667	1.25
1175	5	0	0	1	0	0	0	0	0	1	1	1	1	1	1	1	1	1	1	1	1	1	1	0	1	1
1176	4	1	0	2	1	0	0	0	0	1	1	1	1	1	1	1	1	1	1	1	1	1	1	0	1	1
1181	5	1	0	#NULL!	0	1	0	0	0	1	1	1	1	1	1	1	1	1	1	1	1	1	1	1	1	1
1182	4	1	1	2	0	0	0	0	0	1	1	1	1	1	1	1	1	1	1	1	1	1	1	0	1	1
1185	5	0	1	2	1	0	0	0	0	3	3	1	1	1	1	1	1	1	1	1	1	1	1.30769	0	1.44444	1
1186	5	1	0	2	1	1	0	0	0	2	1	1	1	3	1	1	1	1	1	1	1	1	1.23077	1	1.33333	1
1187	5	0	1	2	1	1	0	0	0	1	1	1	1	1	1	1	1	1	1	1	1	1	1	1	1	1
1188	5	1	#NULL!	#NULL!	1	0	2	1	0	3	1	4	3	1	4	1	2	2	1	1	1	1	1.92308	0	2.33333	1
1189	5	1	1	2	0	1	0	0	0	3	1	3	1	1	1	1	1	1	1	1	1	1	1.30769	1	1.44444	1
1190	5	0	1	2	1	1	0	0	0	1	1	1	1	1	1	1	1	1	1	1	1	1	1	1	1	1
1192	5	1	0	3	1	1	0	0	0	2	1	1	1	2	1	1	1	1	2	2	2	2	1.46154	1	1.22222	2
1195	5	1	1	1	1	0	3	1	0	3	3	1	1	1	1	2	3	3	1	1	1	1	1.69231	0	2	1
1196	5	1	0	1	1	1	0	0	0	2	1	1	1	1	1	1	1	1	1	1	1	1	1.07692	1	1.11111	1
1199	5	1	1	2	1	1	0	0	0	2	1	1	1	2	1	1	2	2	1	1	1	1	1.30769	1	1.44444	1
1200	5	1	1	2	1	1	0	0	0	3	1	1	1	1	1	1	1	1	1	1	1	1	1.15385	1	1.22222	1
1201	5	0	1	1	1	0	0	0	0	1	3	3	3	1	1	1	1	1	2	4	1	1	1.76923	0	1.66667	2
1209	4	0	0	3	1	1	0	0	0	2	1	1	2	1	1	2	2	2	2	2	1	1	1.53846	1	1.55556	1.5
1216	4	1	0	2	0	0	0	0	0	3	1	1	1	1	1	1	1	1	1	3	1	1	1.30769	0	1.22222	1.5
1217	4	1	1	2	1	1	3	1	0	2	1	2	1	2	2	2	2	2	2	3	1	1	1.76923	2	1.77778	1.75
1218	4	1	0	3	#NULL!	1	0	0	0	1	1	1	1	1	1	1	1	1	1	1	1	1	1	1	1	1
1220	4	1	1	#NULL!	1	0	0	0	0	1	1	1	1	1	1	1	1	1	1	1	1	1	1	0	1	1
1222	4	0	0	2	0	0	3	1	0	1	3	3	4	1	1	1	3	3	3	1	1	1	2	0	2.22222	1.5
1223	4	1	1	1	0	1	0	0	0	2	1	1	1	1	1	1	1	1	1	1	1	1	1.07692	1	1.11111	1
1247	4	0	0	1	1	0	0	0	0	1	1	1	1	1	1	1	1	1	4	3	1	3	1.53846	0	1	2.75
1248	4	0	0	2	0	1	0	0	0	1	1	1	1	1	1	1	1	1	1	1	1	1	1	1	1	1
1249	5	1	1	2	#NULL!	0	0	0	0	1	1	1	1	1	1	1	1	1	1	1	1	1	1	0	1	1
1253	5	0	#NULL!	1	0	0	0	0	0	2	1	1	1	1	1	1	1	1	1	1	1	1	1.07692	0	1.11111	1
1255	4	1	1	1	1	1	0	0	0	1	1	1	3	1	1	1	1	1	1	1	1	1	1.15385	1	1.22222	1
1259	4	1	0	#NULL!	0	0	0	0	0	2	2	2	1	2	2	2	2	2	5	5	2	2	2.38462	0	1.88889	3.5

## Sheet: CODES
CHILD	agechild
	SEX	0= male; 1= female
	ceod
	CEODIC	0= ceod=0; 1= ceod>0
	IHODIC	0= good; 1=regular
MOTHER	agemother	0= <30; 1= ≥30
	civilstatus	1= single; 2 married; 3= separate; 4= widow
	work	0= no; 1= yes
	ESDIC	0= low, 1= high
	ESRED	0= C-D-E; 1=B; 2= A
